# Supplementary material
Source: PubMed Central journal article supplement (PMC2779161)
Supplement: NIHMS155648-supplement-01.pdf [file NIHMS155648-supplement-01.pdf]

## Supplemental Figure Legends

**Supplemental Figure 1. Aging elevates production of TNF- $\alpha$  during HSV-2 infection.**  $p = 0.002$  (ANOVA). Values represent the mean $\pm$ -SD of two independent experiments each performed in triplicate.

**Supplemental Figure 2. Age-dependent increases in HSV-2-induced IL-17A production and mortality in the BALB/c, H2<sup>d</sup> mouse strain.** Values in A represent the mean $\pm$ -SD of two independent experiments each performed in triplicate. Significant differences were noted in IL-17A production ( $p < 0.001$ , ANOVA) and mortality ( $p = 0.01$ , Logrank).

**Supplemental Figure 3. Aged BALB/c mice succumb to MCMV infection and exhibit elevated IL-6, IL-17A, and TNF- $\alpha$  serum levels, whereas young counterparts survive with lower proinflammatory cytokine responses.** Values in A-C represent the mean $\pm$ -SD of two independent experiments each performed in triplicate. Young and aged mice exhibited significantly different cytokine levels ( $p < 0.001$ , ANOVA) and survival ( $p = 0.01$ , Logrank).

**Supplemental Figure 4. Aged HSV-2-infected C57BL/6 mice exhibit a dose-dependent elevation in serum IL-17A levels as well as impaired IFN- $\alpha$  responses and viral clearance.** Effect of HSV-2 infection on serum IL-17A levels (A), serum

IFN- $\alpha$  levels (B), and serum viral load (C) in young and aged mice. Viral load was measured using the plaque assay. Values in A-C represent the mean $\pm$ -SD of two independent experiments each performed in triplicate.

**Supplemental Figure 5. A dose of  $10^7$  PFU of HSV-2 is lethal to aged C57BL/6 mice and induces greater cytokine production than sub-lethal infection with  $10^5$  PFU**

**HSV-2.** Comparison of  $10^7$  PFU and  $10^5$  PFU of HSV-2 on serum levels of IL-6 (A), IL-17A (B) and TNF- $\alpha$  (C) as well as mortality (D). Values in A-C represent the mean $\pm$ -SD of two independent experiments each performed in triplicate. Levels of all three cytokines differed between each dose group ( $p < 0.05$ , ANOVA), as did mortality ( $p = 0.01$ , Logrank).

**Supplemental Figure 6. Aged BALB/c mice exhibit higher levels of ALT during MCMV infection than their young counterparts.** Values represent the mean $\pm$ -SD of two independent experiments each performed in triplicate.

**Supplemental Figure 7. A dose of  $10^7$  PFU of HSV-2 induces higher serum ALT levels than  $10^5$  PFU of HSV-2 in aged C57BL/6 mice.** Values represent the mean $\pm$ -SD of two independent experiments each performed in triplicate.

**Supplemental Figure 8. Nine-month-old BALB/c J $\alpha$ 18<sup>-/-</sup> mice exhibit lower serum IL-17A levels during HSV-2 infection than their age-matched wild type**

**counterparts.** Values represent the mean $\pm$ -SD of two independent experiments each performed in triplicate.  $p = 0.01$  (ANOVA) between the two groups.

**Supplemental Figure 9. Aged mice exhibit a greater number of liver NKT cells than young mice prior to infection.** Infection did not alter the number of NKT cells in either group. Values represent the mean $\pm$ -SD of two independent experiments each performed in triplicate.\*  $p = 0.03$  (T-test)

**Supplemental Figure 10. Middle-aged wild type and IL-6<sup>-/-</sup> mice exhibit similar IL-17A levels during HSV-2 infection.** Values represent the mean $\pm$ -SD of two independent experiments each performed in triplicate.

**Supplemental Figure 11. Depletion of pDCs in young, HSV-2 infected C57BL/6 mice leads to increased viral load in the liver.** Values represent the mean $\pm$ -SD of two independent experiments each performed in triplicate.

**Supplemental Figure 12. Administration of recombinant IL-17A to non-infected young or aged mice does not induce serum ALT release at 24h post administration (A) despite inducing high serum IL-17A levels (B). All mice that received recombinant IL-17A remained clinically well without any mortality.** Values represent the mean $\pm$ -SD of two independent experiments each performed in triplicate.

**Supplemental Figure 13. HSV-2 viral load is comparable between aged mice treated with anti-IL-17A antibody and isotype control antibody as measured by plaque assay in liver and spleen (A) and viral load PCR assay in the serum (B).**

Values represent the mean $\pm$ SD of two independent experiments each performed in triplicate.

**Supplemental Figure 14. Anti-IL-17A antibody treatment reduces serum TNF- $\alpha$  levels 24 h after HSV-2 infection in aged mice.** Values represent the mean $\pm$ SD of two independent experiments each performed in triplicate.

**Supplemental Figure 15. IL-17A neutralization decreases ALT levels and mortality in aged mice infected with MCMV or HSV-2.** (A, B) Effect of  $\alpha$ -IL-17A neutralizing antibody or an isotype control on ALT levels (A) and survival (B) in BALB/c mice following MCMV infection. (C, D) Effect of  $\alpha$ -IL-17A neutralizing antibody or an isotype control on ALT levels (C) and survival (D) in C57BL/6 mice at 24 h after HSV-2 infection. IL-17A neutralization significantly enhanced survival in both MCMV-infected BALB/c mice and HSV-infected C57BL/6 mice ( $p = 0.02$  for both, Logrank). Values in A and C represent the mean $\pm$ SD of two independent experiments each performed in triplicate.

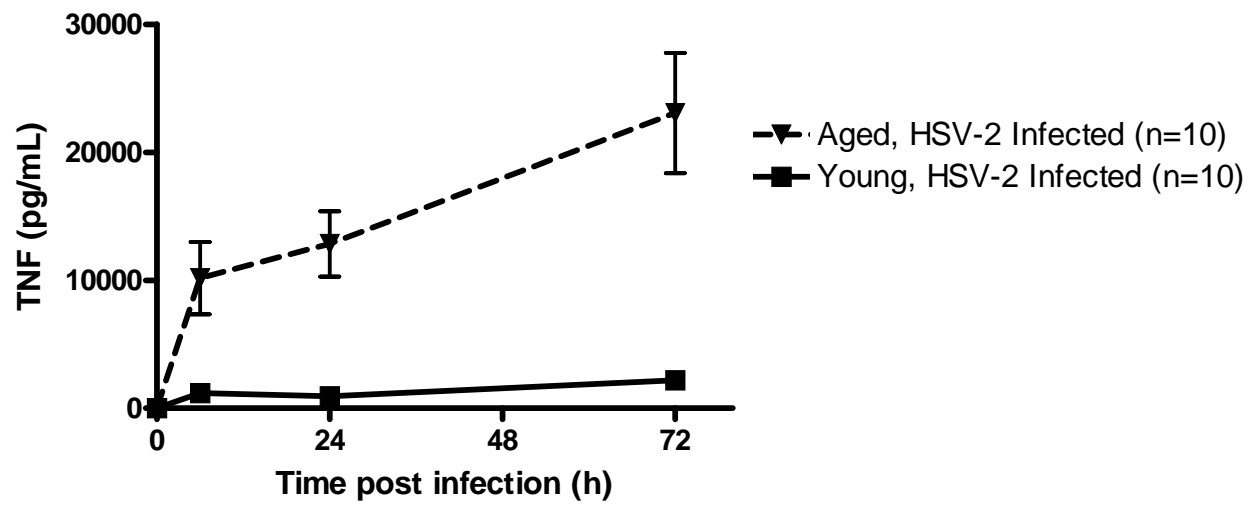

**Supplemental Figure 1**

**A**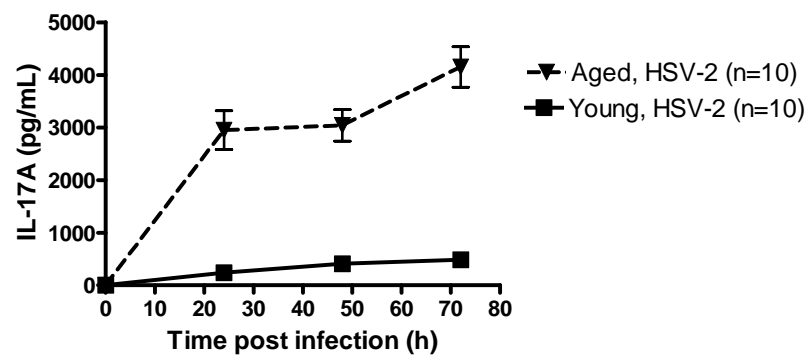**B**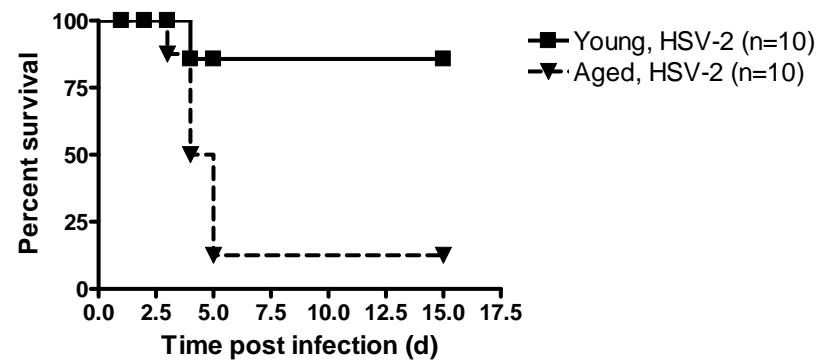**Supplemental Figure 2**

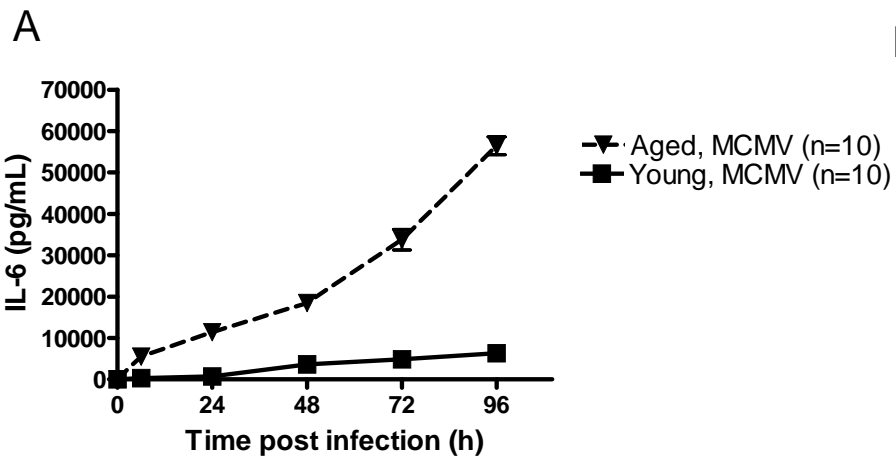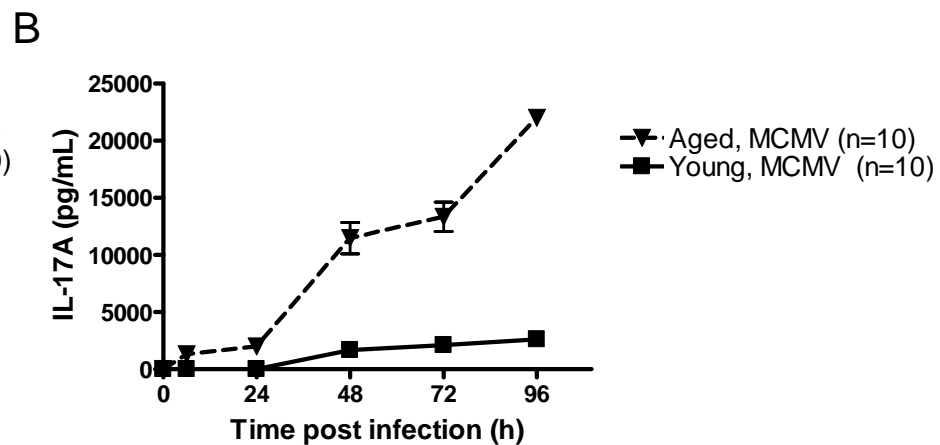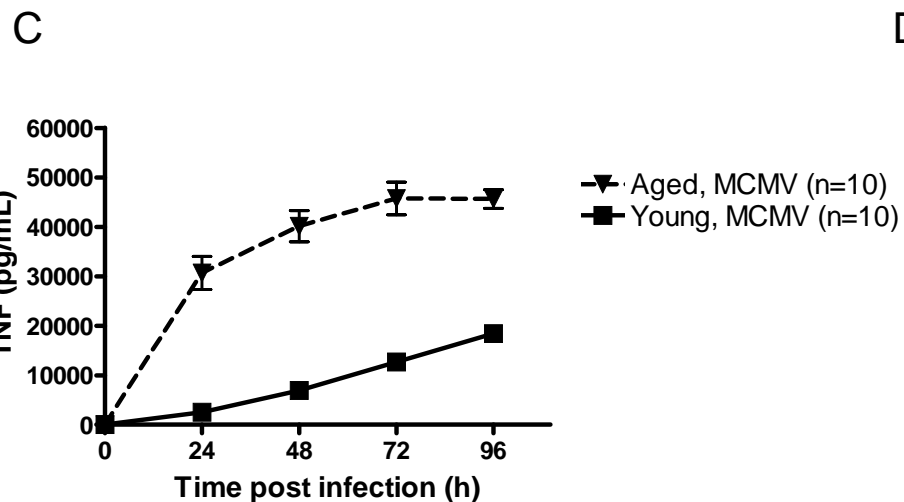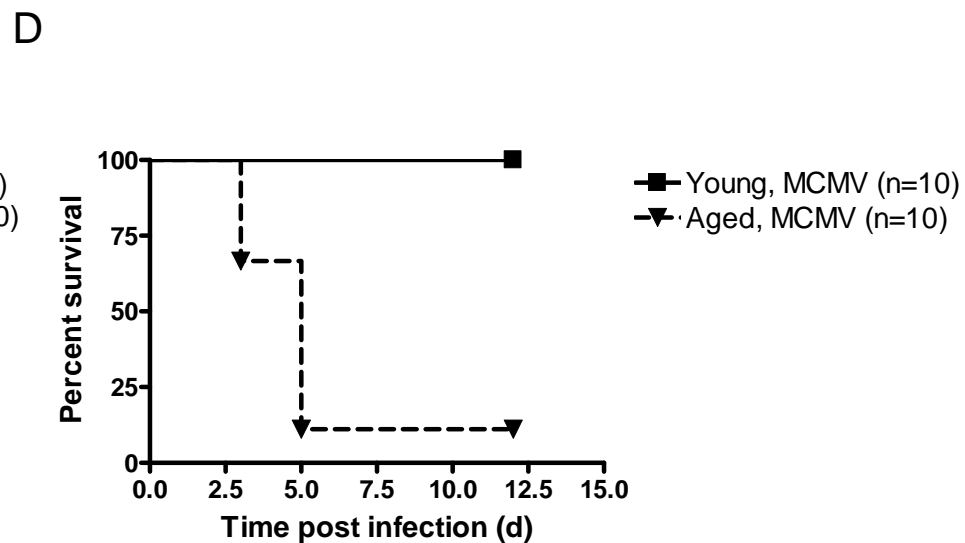

**Supplemental Figure 3**

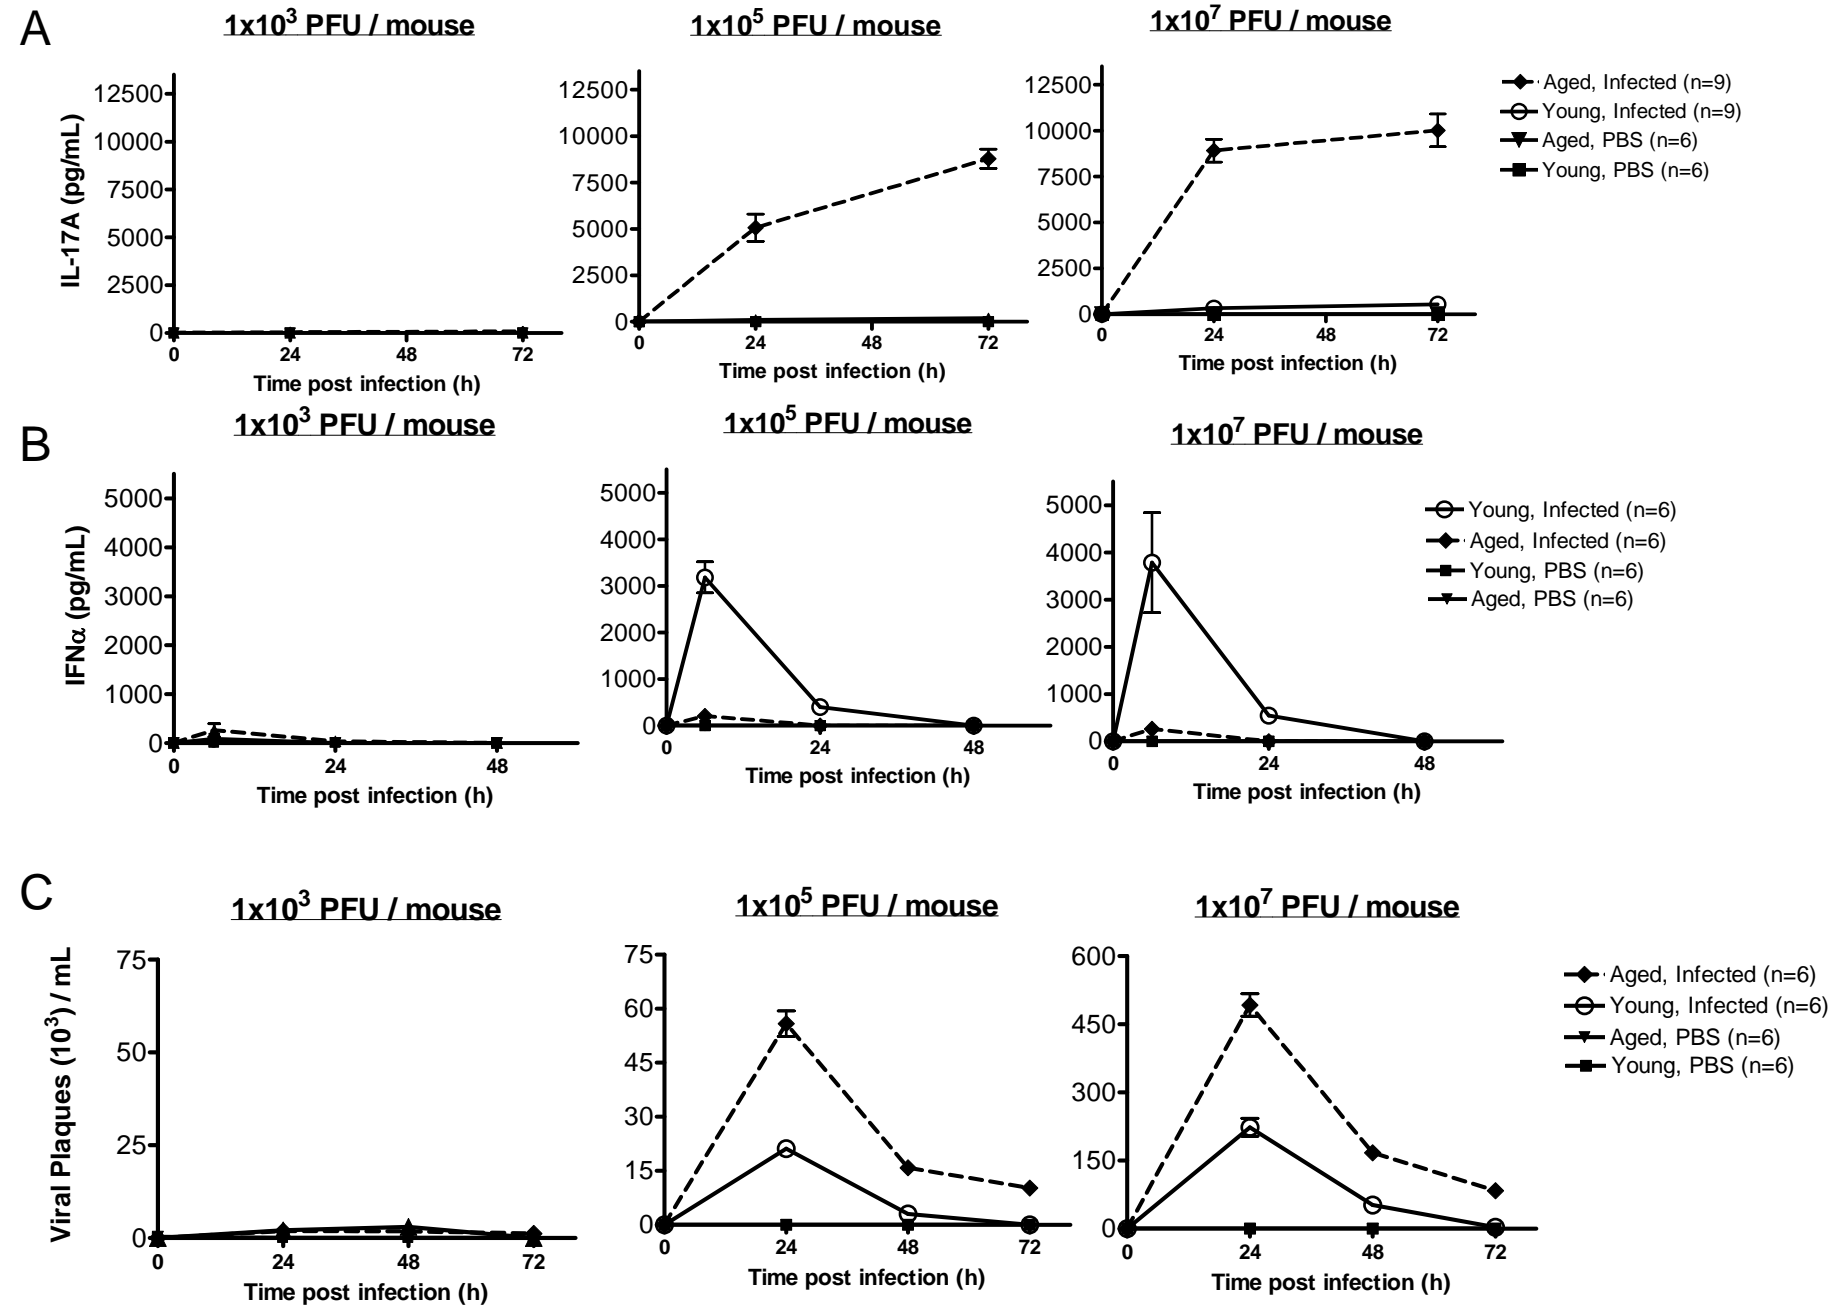

**Supplemental Figure 4**



A

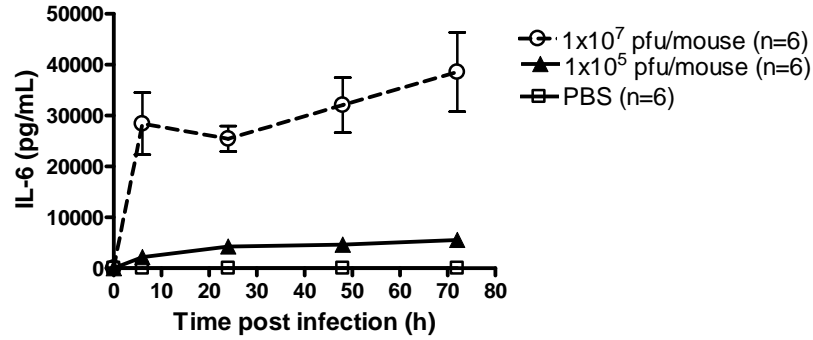

B

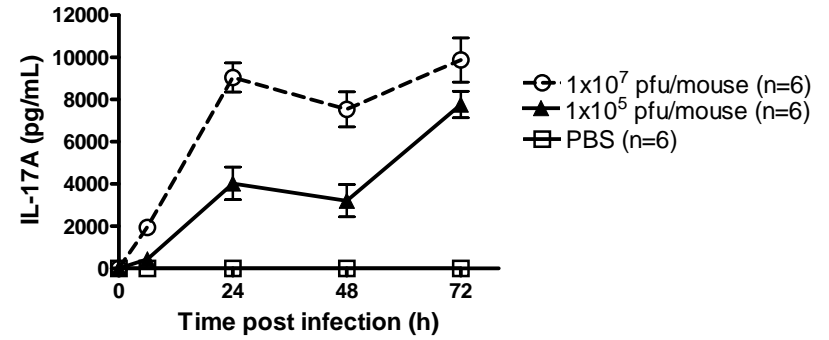

C

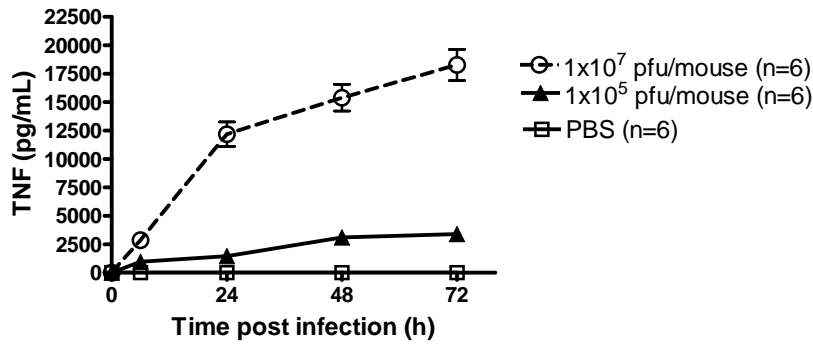

D

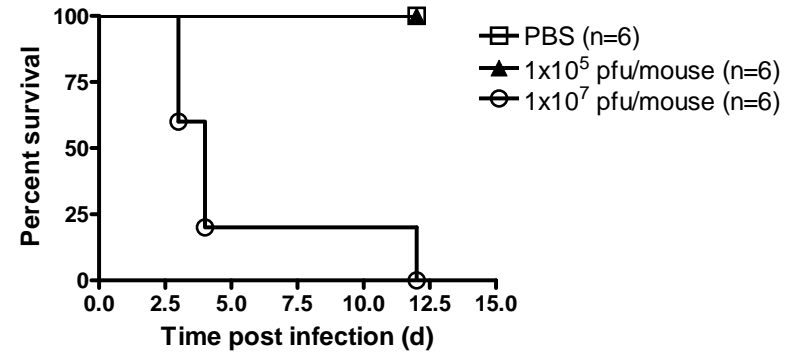

**Supplemental Figure 5**

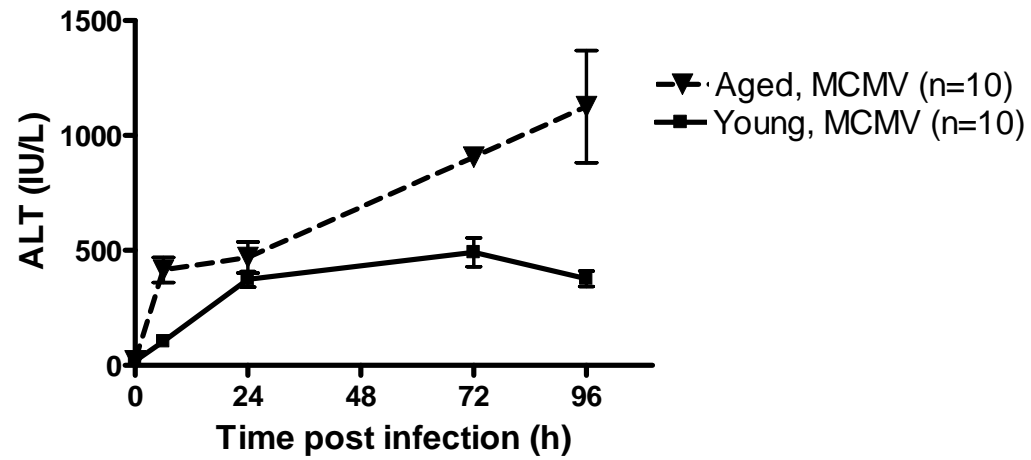

**Supplemental Figure 6**

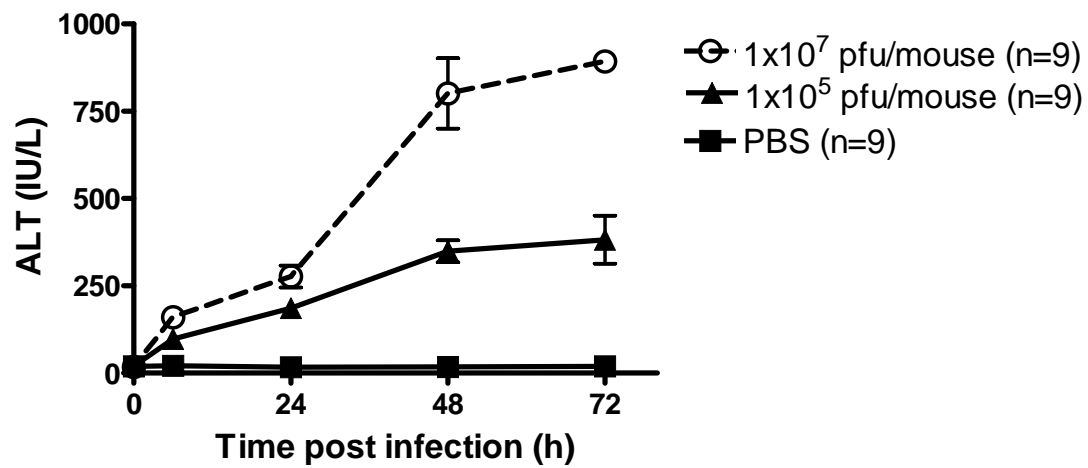

**Supplemental Figure 7**

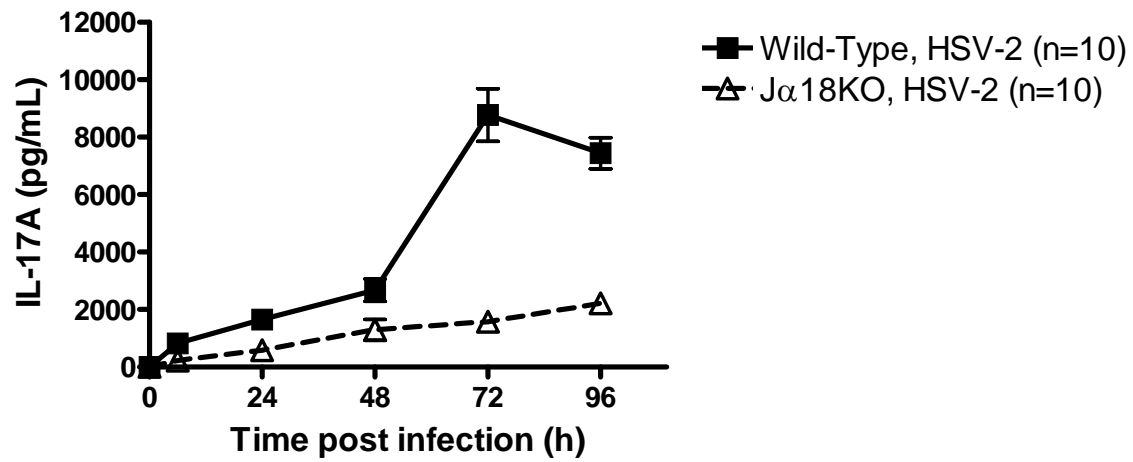

**Supplemental Figure 8**

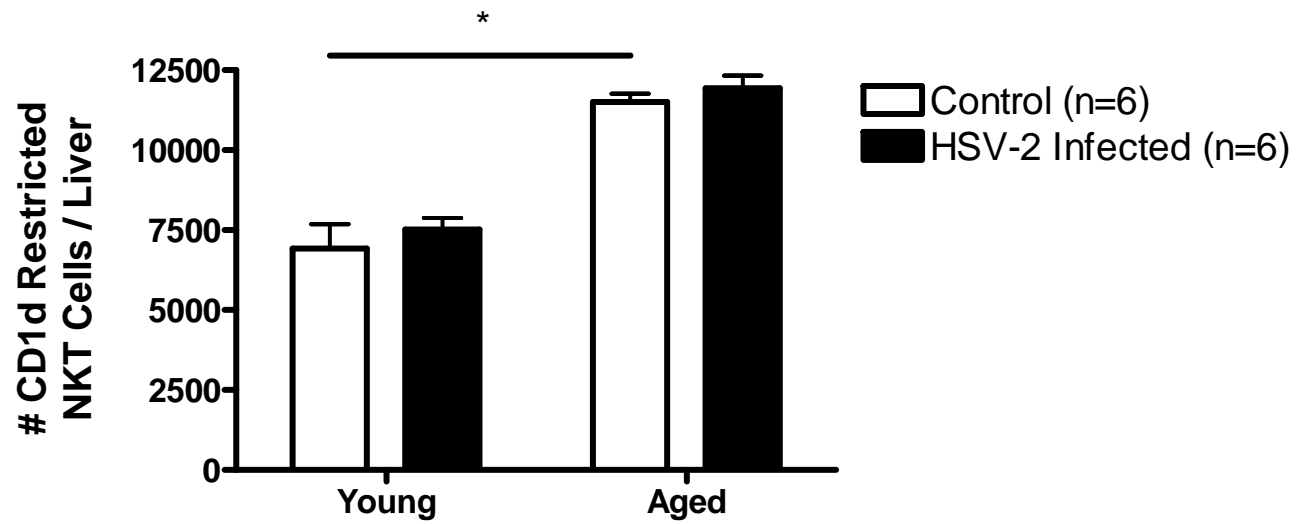

**Supplemental Figure 9**

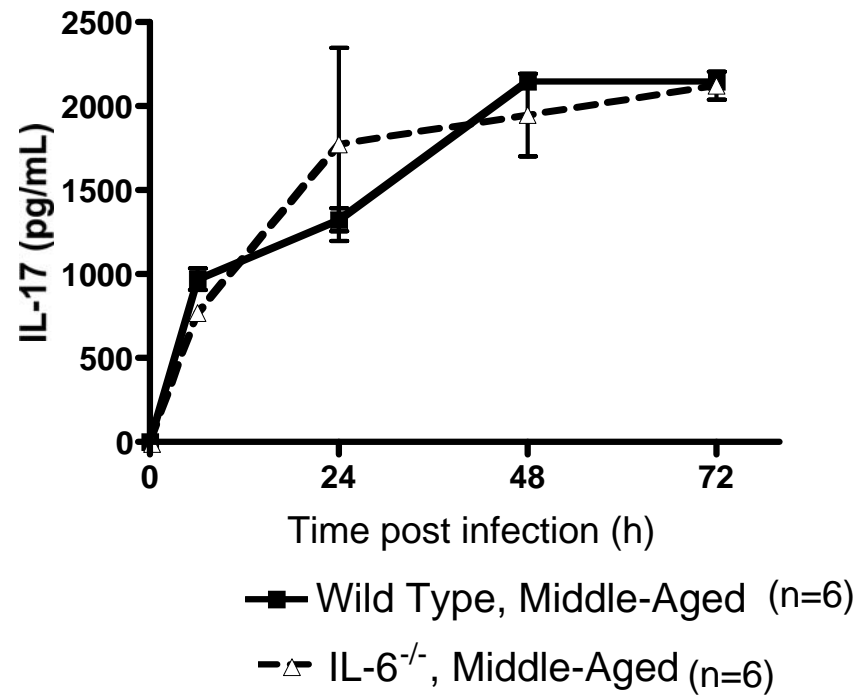

**Supplemental Figure 10**

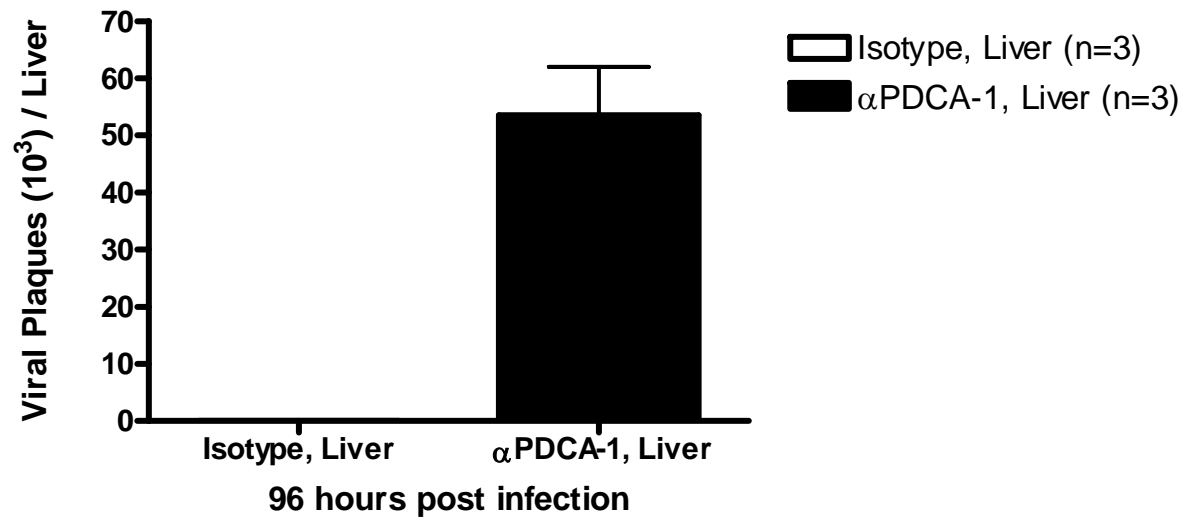

**Supplemental Figure 11**

A

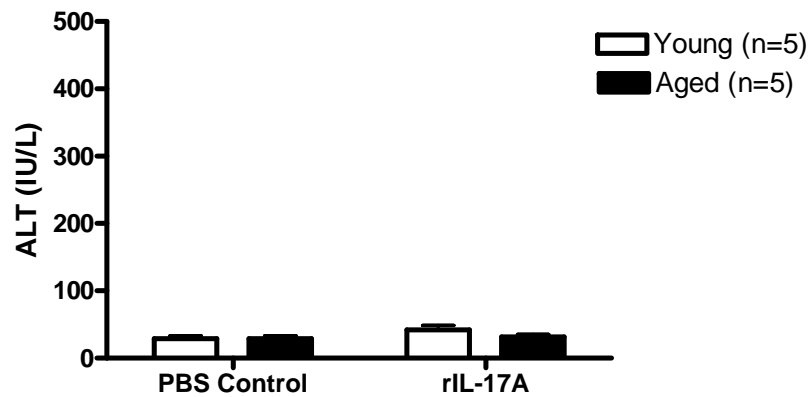

B

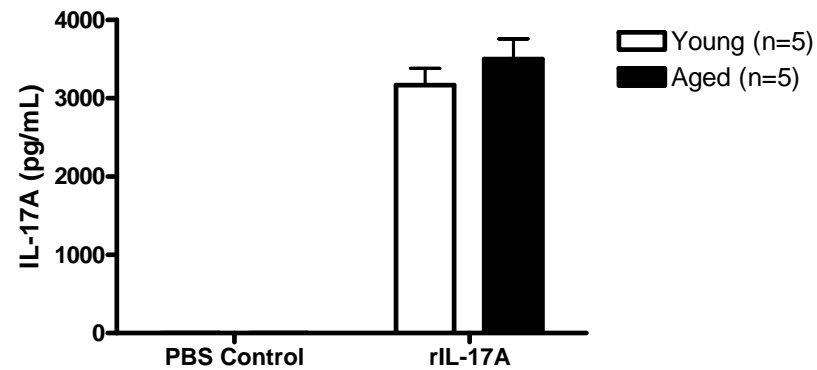

Supplemental Figure 12



A

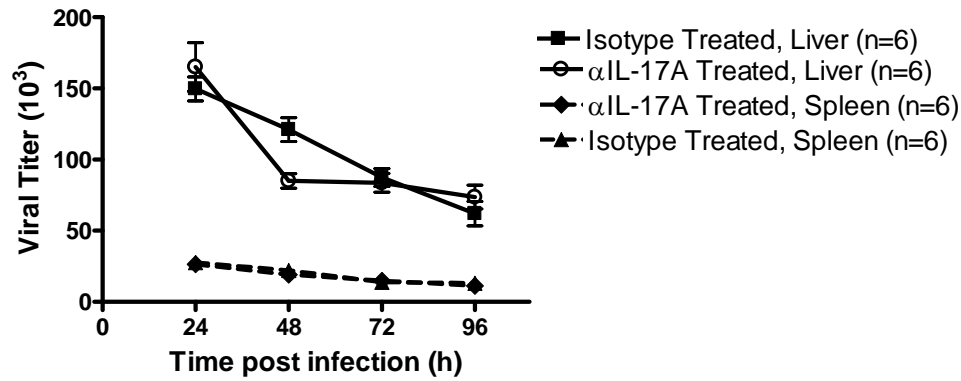

B

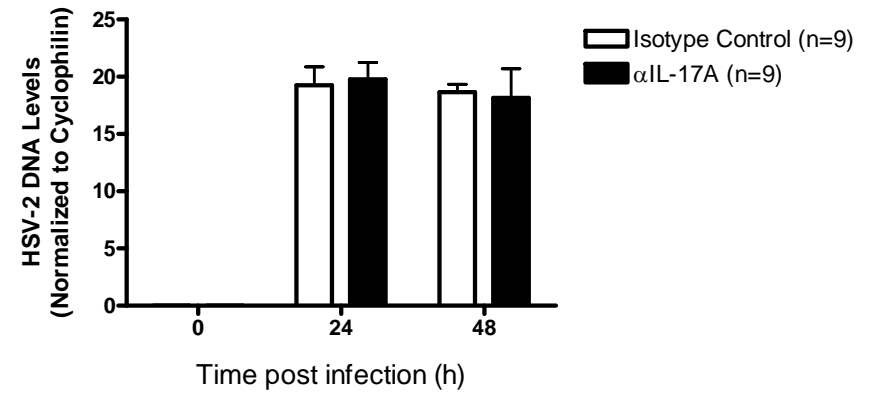

Supplemental Figure 13

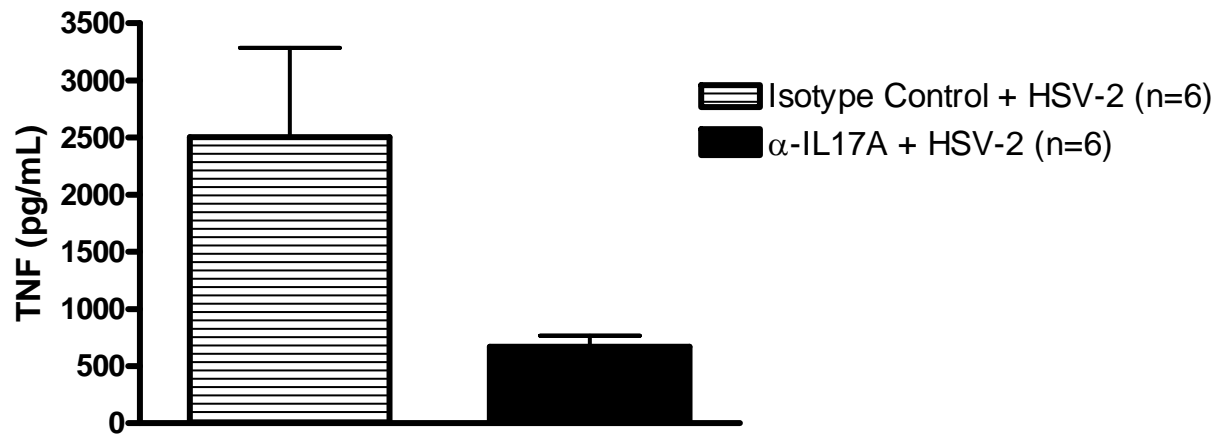

**Supplemental Figure 14**

**A**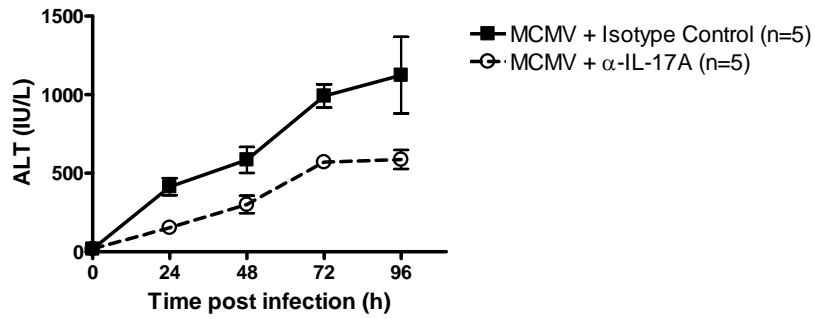**B**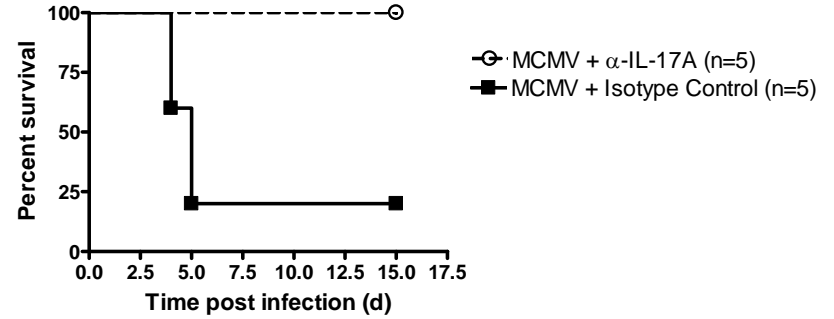**C**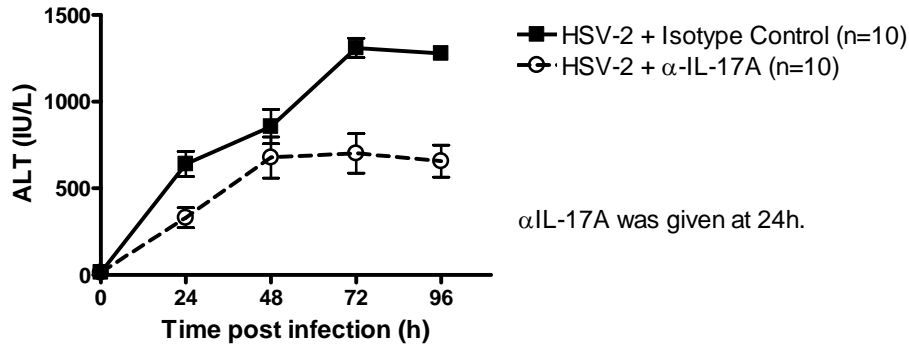**D**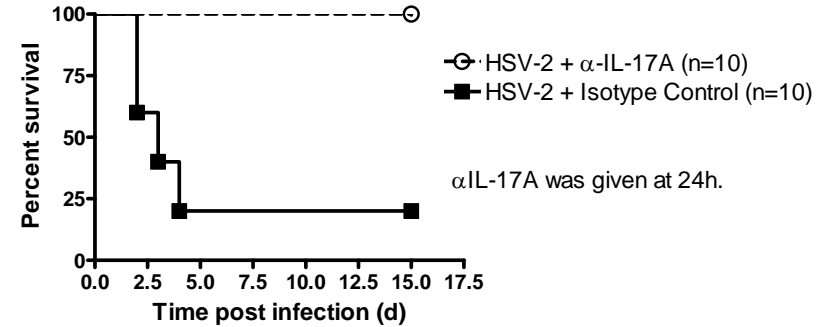**Supplemental Figure 15**
